# Supplementary material for: Green Synthesis of Nitrogen–Doped Carbon Dots from Fresh Tea Leaves for Selective Fe3+ Ions Detection and Cellular Imaging
Source: MDPI journal article supplement (doi:10.3390/nano12060986), 2022-03-17
Supplement: s1 [file s1]

# Supplementary Materials

## Green Synthesis of Nitrogen-Doped Carbon Dots from Fresh tea Leaves for Selective Fe<sup>3+</sup> Ions Detection and Cellular Imaging

Guili Ge <sup>1</sup>, Lin Li <sup>2</sup>, Mingjian Chen <sup>1</sup>, Xu Wu <sup>1</sup>, Yuxin Yang<sup>1</sup>, Dan Wang<sup>1</sup>, Sicheng Zuo <sup>1</sup>, Zhaoyang Zeng <sup>1</sup>, Wei Xiong <sup>1,\*</sup> and Can Guo <sup>1,\*</sup>

<sup>1</sup> Key Laboratory of Carcinogenesis and Cancer Invasion of the Chinese Ministry of Education, Cancer Research Institute and School of Basic Medical Science, Central South University, Changsha 410008, China; geguili@csu.edu.cn (G.G.); chenmingjian@csu.edu.cn (M.C.); wuxu1028@csu.edu.cn (X.W.); 196511048@csu.edu.cn (Y.Y.); 206501028@csu.edu.cn (D.W.); 206511050@csu.edu.cn (S.Z.); zengzhaoyang@csu.edu.cn (Z.Z.)

<sup>2</sup> College of Chemistry and Chemical Engineering, Central South University, Changsha 410083, China; lilin2018@csu.edu.cn

\* Correspondence: xiongwei@csu.edu.cn (W.X.); guocde@csu.edu.cn (C.G.)

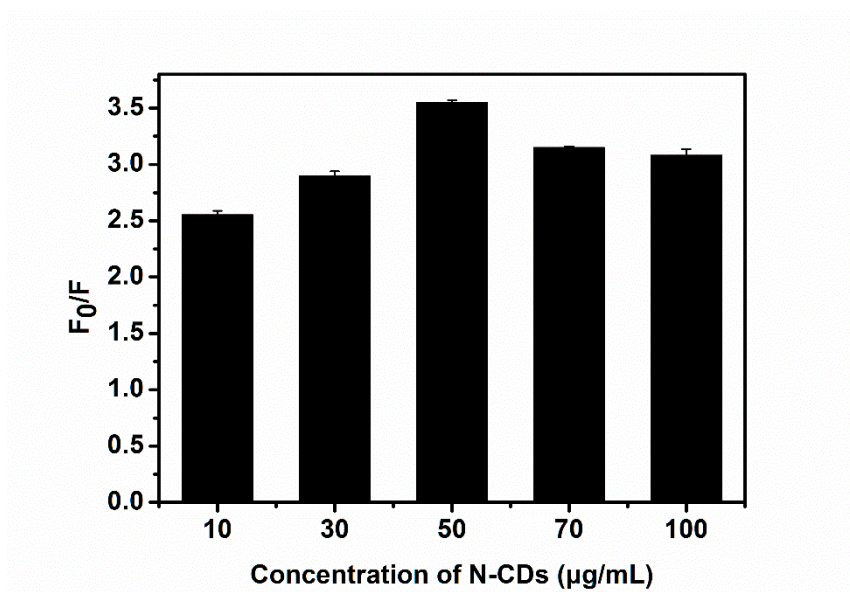

Figure S1. Optimization of the concentration of N-CDs.

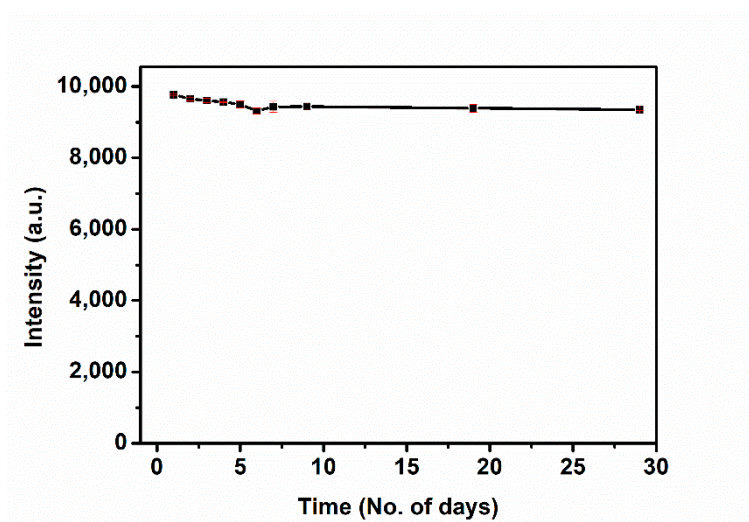

**Figure S2.** Fluorescent stability of the N-CDs.

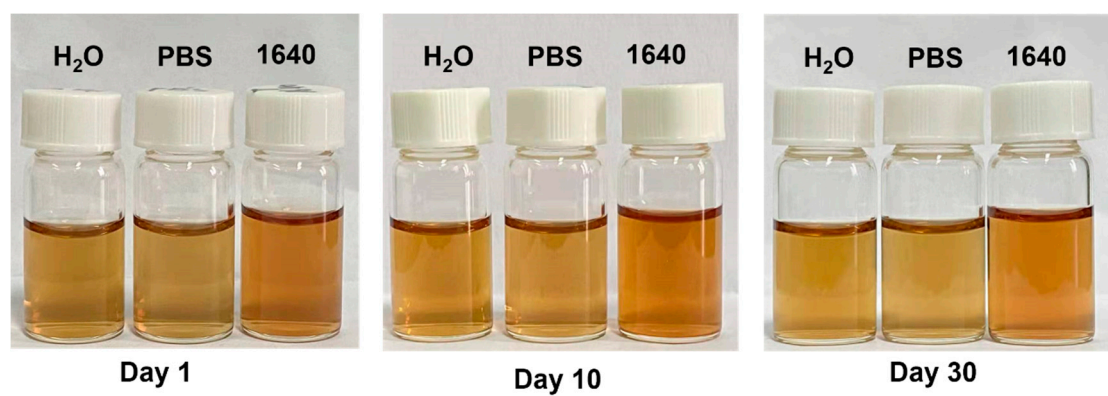

**Figure S3.** The photos of N-CDs dispersed in H<sub>2</sub>O, PBS and 1640 cell culture medium during 30 days.
